# Supplementary material for: Correlation Between Gut Microbiota and Testosterone in Male Patients With Type 2 Diabetes Mellitus
Source: PubMed Central journal article supplement (PMC8990747; doi:10.3389/fendo.2022.836485), 2022-03-25
Supplement: DataSheet_1.pdf [file DataSheet_1.pdf]

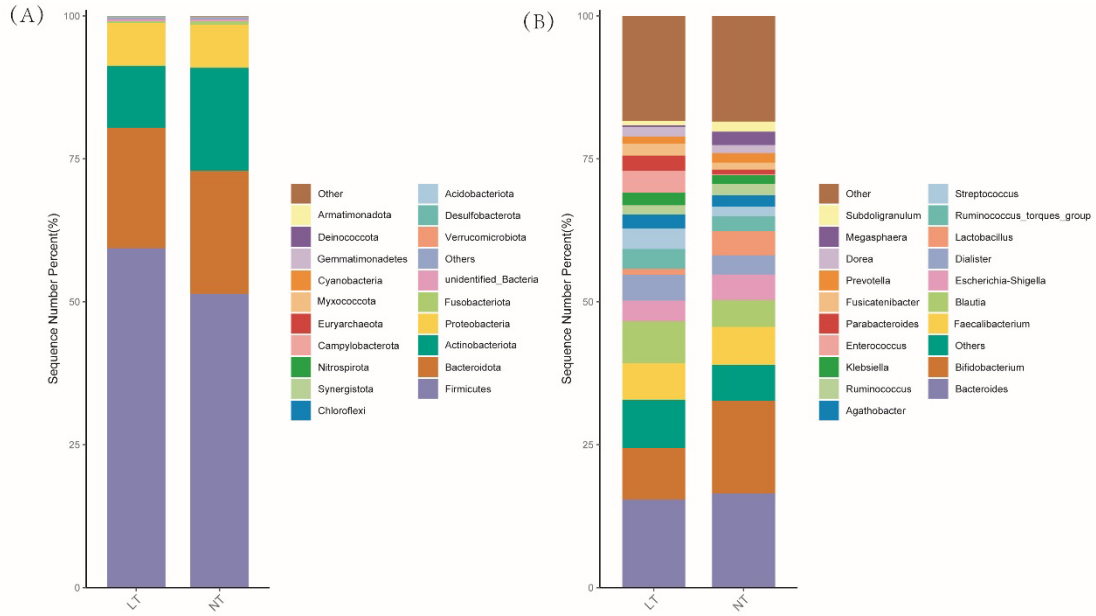

**Supplemental Fig.1 Microbiota Composition in different groups**

(A) The major microbiota taxa in samples of two groups at the phylum level. (B) The major microbiota taxa in samples of two groups at the genus level.

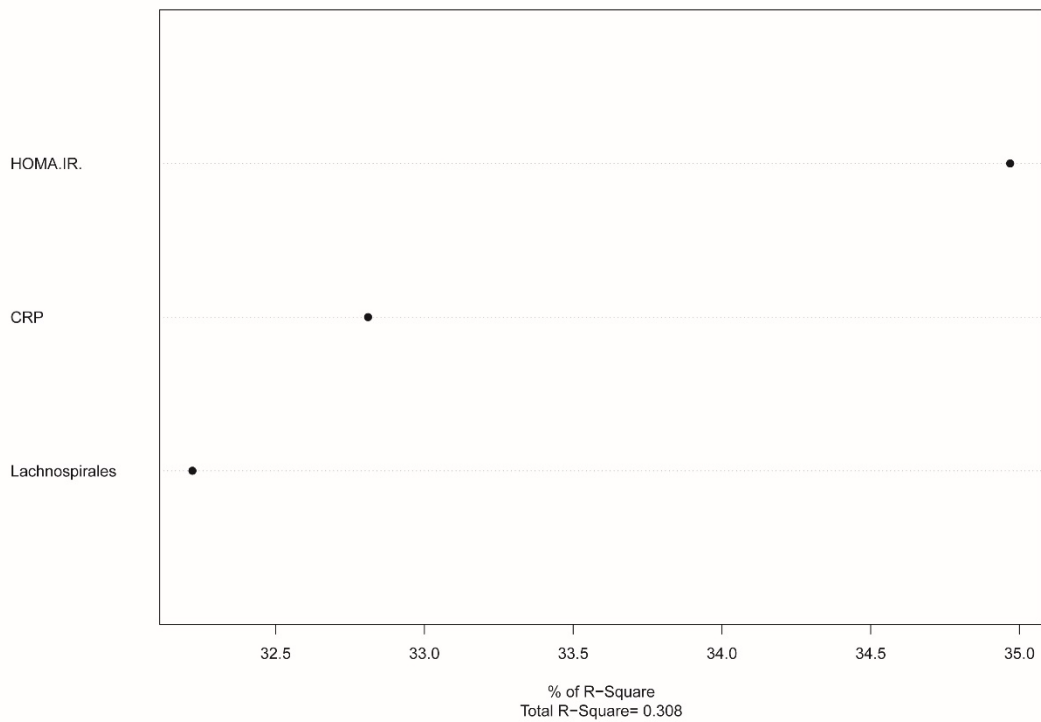

**Supplemental Fig.2 Relative Importance of Predictor Variables.  $R^2=30.8\%$ , HOMA-IR**

explained 34.97% of R2 and CRP explained 32.22% of R2, followed by Lachnospirales (32.22%)
